# Supplementary material
Source: Springer Nature journal article supplement (https://www.springermedizin.de/resource/supplementary/12894_2013_302_MOESM8_ESM.pdf/9513430)

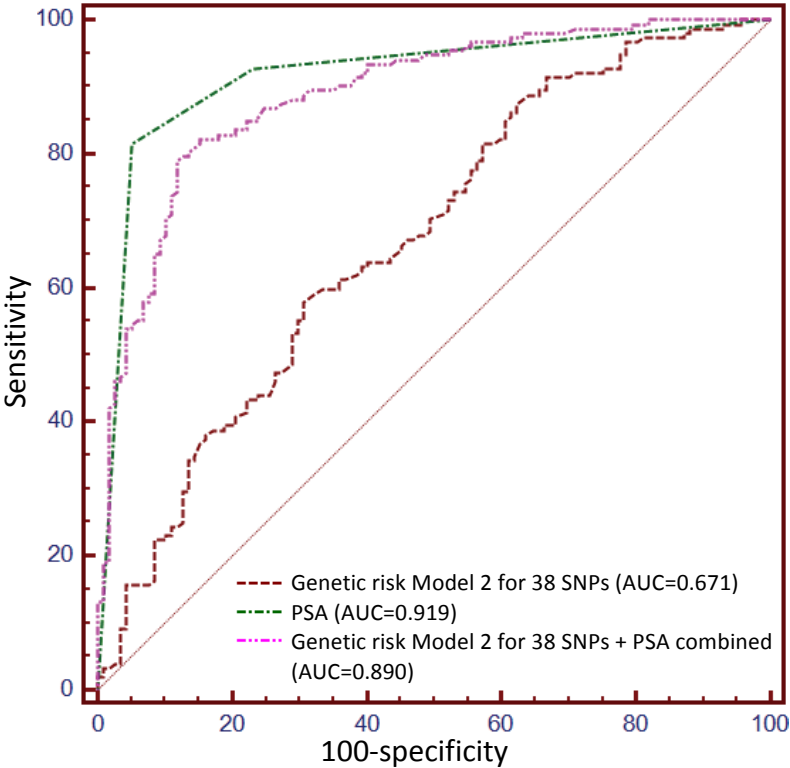

Supplement: MOESM8 [file 9513430]
